# Supplementary material
Source: Springer Nature journal article supplement (https://www.springermedizin.de/resource/supplementary/12958_2013_1138_MOESM4_ESM.pdf/9566898)

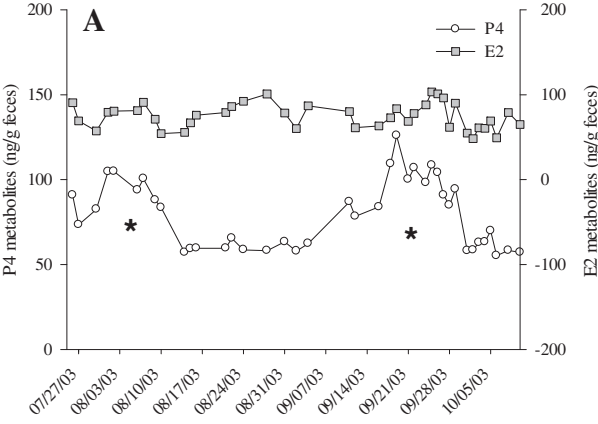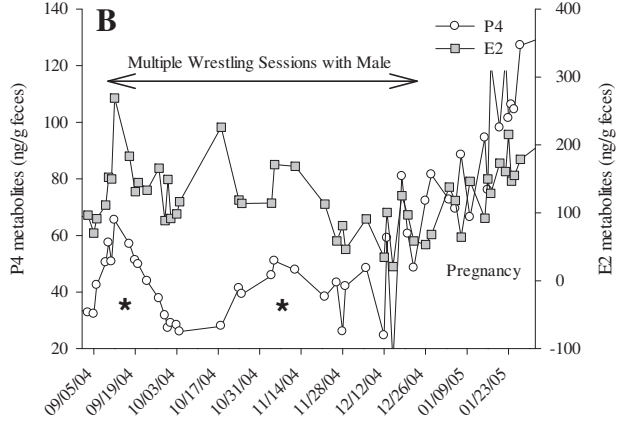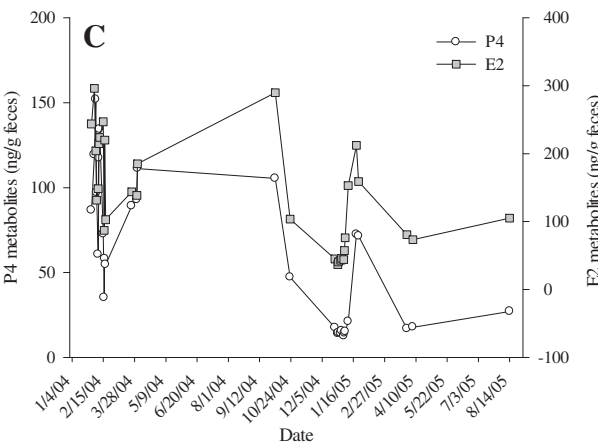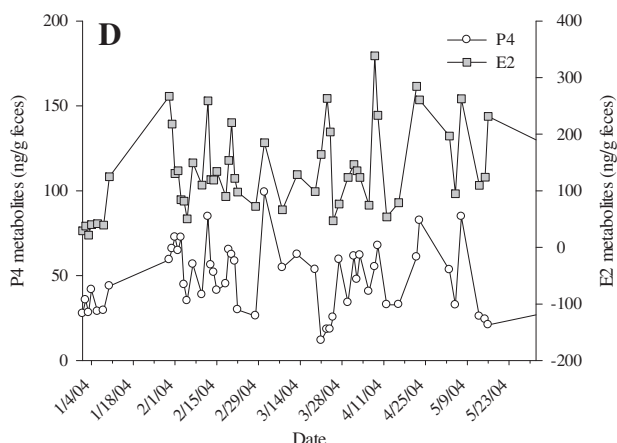

Supplement: MOESM4 [file 9566898]
